# Supplementary material
Source: PubMed Central journal article supplement (PMC2844886)
Supplement: NIHMS140548-supplement-etables.pdf [file NIHMS140548-supplement-etables.pdf]

Supplementary Table. *CREB1* Individual Marker Association Results for Stage 2 (N=401 cases, 351 controls) for males [M] (N=497), females [F] (N=255), and together [All].

| Marker | Marker ID (dbSNP) | Alleles (major) | Group    | Genotypes (%) |       |       | Genotypic <i>p</i> -Value |      |      | Alleles (%) |      | Allelic <i>p</i> -Value |      |      |
|--------|-------------------|-----------------|----------|---------------|-------|-------|---------------------------|------|------|-------------|------|-------------------------|------|------|
|        |                   |                 |          | A1/A1         | A1/A2 | A2/A2 | All                       | M    | F    | A1          | A2   | All                     | M    | F    |
| 1      | rs2253206         | A/G<br>(G)      | Cases    | 27.1          | 51.4  | 21.5  | 0.71                      | 0.30 | 0.56 | 52.8        | 47.2 | 0.43                    | 0.13 | 0.55 |
|        |                   |                 | Controls | 25.3          | 50.9  | 23.8  |                           |      |      | 50.7        | 49.3 |                         |      |      |
| 3      | rs11904814        | G/T<br>(T)      | Cases    | 45.9          | 44.2  | 9.9   | 0.58                      | 0.52 | 0.66 | 68.0        | 32.0 | 0.31                    | 0.37 | 0.57 |
|        |                   |                 | Controls | 42.9          | 45.2  | 11.9  |                           |      |      | 65.6        | 34.5 |                         |      |      |
| 4      | rs6740584         | C/T<br>(T)      | Cases    | 30.0          | 48.4  | 21.6  | 0.83                      | 0.79 | 0.96 | 54.2        | 45.8 | 0.66                    | 0.52 | 0.93 |
|        |                   |                 | Controls | 32.0          | 46.6  | 21.4  |                           |      |      | 55.3        | 44.7 |                         |      |      |
| 5      | rs17811997        | C/G<br>(G)      | Cases    | 87.8          | 11.7  | 0.5   | 0.88                      | 0.97 | 0.65 | 93.6        | 6.4  | 0.88                    | 0.82 | 0.99 |
|        |                   |                 | Controls | 87.9          | 11.8  | 0.3   |                           |      |      | 93.8        | 6.2  |                         |      |      |
| 8      | rs2551941         | A/T<br>(T)      | Cases    | 41.3          | 45.7  | 13.0  | 0.66                      | 0.65 | 0.54 | 64.2        | 35.8 | 0.47                    | 0.37 | 0.96 |
|        |                   |                 | Controls | 38.0          | 48.6  | 13.4  |                           |      |      | 62.3        | 37.7 |                         |      |      |
